# Supplementary material
Source: PubMed Central journal article supplement (PMC3274662)
Supplement: NIHMS329239-supplement-01.pdf [file NIHMS329239-supplement-01.pdf]

**Supplementary Table 1. Effective diameters of NPs formulated with different sizes pDNA.**

| pDNA   | pDNA size in kbp | D <sub>Eff</sub> (average ± SD in nm) |
|--------|------------------|---------------------------------------|
| pJET   | 4                | 254 ± 8                               |
| pGL2   | 6                | 210 ± 6                               |
| pRED   | 6.5              | 233 ± 10                              |
| pLWXu1 | 12.5             | 172 ± 43                              |
