# Supplementary material
Source: PubMed Central journal article supplement (PMC3274662)
Supplement: NIHMS329239-supplement-02.pdf [file NIHMS329239-supplement-02.pdf]

**Supplementary Table 2. Effective diameters of NPs formulated with different supercoiled content of pDNA.**

| Supercoiled content of pDNA (%) | Average $D_{\text{Eff}}$ by DLS $\pm$ SD (nm) |
|---------------------------------|-----------------------------------------------|
| 8                               | 145 $\pm$ 8                                   |
| 12                              | 164 $\pm$ 3                                   |
| 17                              | 143 $\pm$ 2                                   |
| 31                              | 136 $\pm$ 4                                   |
| 55                              | 148 $\pm$ 4                                   |
| 75                              | 190 $\pm$ 1                                   |
| 81                              | 130 $\pm$ 7                                   |
| 95                              | 130 $\pm$ 5                                   |
