# Supplementary material
Source: PubMed Central journal article supplement (PMC3274662)
Supplement: NIHMS329239-supplement-03.pdf [file NIHMS329239-supplement-03.pdf]

**Supplementary Table 3. Effective diameters of NPs formulated with different molar ratio of the pDNA and PEIm components.**

| N/P ratio | Average $D_{\text{Eff}}$ by DLS $\pm$ SD (nm) |
|-----------|-----------------------------------------------|
| 1         | 188 $\pm$ 58                                  |
| 2         | 117 $\pm$ 4                                   |
| 3         | 128 $\pm$ 5                                   |
| 4         | 104 $\pm$ 2                                   |
| 5         | 101 $\pm$ 2                                   |
| 6         | 110 $\pm$ 7                                   |
