# Supplementary material
Source: PubMed Central journal article supplement (PMC3274662)
Supplement: NIHMS329239-supplement-04.pdf [file NIHMS329239-supplement-04.pdf]

**Supplementary Table 4. Average particle size measured by DLS of NPs formulated with PEI or different molecular weight PEIm-s.**

| $M_n$ of the polymer | Mannobiose content of polymer (%) | $D_{Eff} \pm SD$ (nm) |
|----------------------|-----------------------------------|-----------------------|
| 22 kDa               | 0                                 | $199 \pm 10$          |
| 5.7 kDa              | 3                                 | $225 \pm 21$          |
| 22 kDa               | 3                                 | $172 \pm 3$           |
| 33.6 kDa             | 3                                 | $189 \pm 7$           |
